# Supplementary material for: Glycemic Control, Basal/Bolus Distribution, BMI and Meal Management in Children and Adolescents with Type 1 Diabetes and Advanced Hybrid Closed Loop
Source: MDPI journal article supplement (doi:10.3390/nu15234875), 2023-11-22
Supplement: s1 [file s1]

*Table 1 Supplementary. Basal-bolus insulin changes*

|                                            | Summary statistics | Manual Mode<br>(N = 83) | Automode 3M<br>(N = 83) | Automode 6M<br>(N = 83) | Mean change<br>95% CI<br>p-value              |                                               |
|--------------------------------------------|--------------------|-------------------------|-------------------------|-------------------------|-----------------------------------------------|-----------------------------------------------|
|                                            |                    |                         |                         |                         | Automode 3M<br>(vs. Manual Mode)              | Automode 6M<br>(vs. Manual Mode)              |
| Basal volume (%)                           | N                  | 82 (98.8%)              | 83 (100.0%)             | 81 (97.6%)              | <b>-5.3</b><br>(-7.8--2.8)<br><b>&lt;.001</b> | <b>-4.3</b><br>(-6.4--2.1)<br><b>&lt;.001</b> |
|                                            | Mean ± SD          | 43.6 ± 10.9             | 38.3 ± 7.3              | 39.2 ± 7.7              |                                               |                                               |
|                                            | Median (IQR)       | 42.5 (36.0- 50.0)       | 38.0 (32.0- 42.0)       | 39.0 (33.0- 44.0)       |                                               |                                               |
|                                            | Min-Max            | 21.0 - 71.0             | 25.0 - 61.0             | 27.0 - 67.0             |                                               |                                               |
| Correction Bolus volume (%)                | N                  | 0 (0.0%)                | 83 (100.0%)             | 80 (96.4%)              | -                                             | -                                             |
|                                            | Mean ± SD          | . ± .                   | 24.1 ± 9.9              | 24.5 ± 10.0             |                                               |                                               |
|                                            | Median (IQR)       | . ( . - . )             | 25.0 (18.0- 30.0)       | 24.0 (17.0- 32.0)       |                                               |                                               |
|                                            | Min-Max            | . - .                   | 1.0 - 58.0              | 7.0 - 66.0              |                                               |                                               |
| Bolus volume (%)<br>(including correction) | N                  | 82 (98.8%)              | 83 (100.0%)             | 81 (97.6%)              | <b>4.8</b><br>(2.2-7.4)<br><b>&lt;.001</b>    | <b>4.3</b><br>(2.0-6.5)<br><b>&lt;.001</b>    |
|                                            | Mean ± SD          | 56.4 ± 10.9             | 61.3 ± 8.0              | 60.8 ± 7.7              |                                               |                                               |
|                                            | Median (IQR)       | 57.5 (50.0- 64.0)       | 62.0 (58.0- 68.0)       | 61.0 (56.0- 67.0)       |                                               |                                               |
|                                            | Min-Max            | 29.0 - 79.0             | 29.0 - 75.0             | 33.0 - 73.0             |                                               |                                               |

Abbreviations: Automode 3M, first 14 days after 3 months; Automode 6M, first 14 days after 6 months; CI, confidence interval; IQR, interquartile range; SD, standard deviation. Bold indicates statistically significant.
