# Supplementary material for: Glycemic Control, Basal/Bolus Distribution, BMI and Meal Management in Children and Adolescents with Type 1 Diabetes and Advanced Hybrid Closed Loop
Source: MDPI journal article supplement (doi:10.3390/nu15234875), 2023-11-22
Supplement: s1 [file s1]

*Table 3 Supplementary. Multivariate models by age*

| Outcome                  | Variable                  | Category                      | Mean change (95% CI) | p-value         |
|--------------------------|---------------------------|-------------------------------|----------------------|-----------------|
| TIR (%) 70-180 mg/dL     | Period                    | Automode 3M (vs. Manual Mode) | 9.9 (7.3-12.5)       | <b>&lt;.001</b> |
|                          | Period                    | Automode 6M (vs. Manual Mode) | 9.0 (6.9-11.1)       | <b>&lt;.001</b> |
|                          | Age class (> 13 vs. ≤ 13) |                               | 5.3 (1.8-8.9)        | <b>0.003</b>    |
| SG CV (%)                | Period                    | Automode 3M (vs. Manual Mode) | -0.9 (-2.4-0.5)      | 0.202           |
|                          | Period                    | Automode 6M (vs. Manual Mode) | -0.2 (-1.4-1.0)      | 0.753           |
|                          | Age class (> 13 vs. ≤ 13) |                               | -1.2 (-3.0-0.6)      | 0.180           |
| GMI (%)                  | Period                    | Automode 3M (vs. Manual Mode) | -0.3 (-0.5--0.2)     | <b>&lt;.001</b> |
|                          | Period                    | Automode 6M (vs. Manual Mode) | -0.4 (-0.5--0.3)     | <b>&lt;.001</b> |
|                          | Age class (> 13 vs. ≤ 13) |                               | -0.2 (-0.4--0.1)     | <b>0.003</b>    |
| Basal volume (%)         | Period                    | Automode 3M (vs. Manual Mode) | -5.3 (-7.8--2.8)     | <b>&lt;.001</b> |
|                          | Period                    | Automode 6M (vs. Manual Mode) | -4.3 (-6.4--2.1)     | <b>&lt;.001</b> |
|                          | Age class (> 13 vs. ≤ 13) |                               | 0.7 (-2.1-3.5)       | 0.622           |
| Bolus volume (%)         | Period                    | Automode 3M (vs. Manual Mode) | 4.8 (2.2-7.4)        | <b>&lt;.001</b> |
|                          | Period                    | Automode 6M (vs. Manual Mode) | 4.3 (2.0-6.5)        | <b>&lt;.001</b> |
|                          | Age class (> 13 vs. ≤ 13) |                               | -1.0 (-3.8-1.9)      | 0.506           |
| TDD/kg (units)           | Period                    | Automode 3M (vs. Manual Mode) | 0.1 (0.0-0.1)        | <b>0.008</b>    |
|                          | Period                    | Automode 6M (vs. Manual Mode) | 0.1 (0.0-0.1)        | <b>&lt;.001</b> |
|                          | Age class (> 13 vs. ≤ 13) |                               | 0.0 (-0.1-0.1)       | 0.911           |
| CHO/kg (gr)              | Period                    | Automode 3M (vs. Manual Mode) | 0.1 (-0.4-0.5)       | 0.807           |
|                          | Period                    | Automode 6M (vs. Manual Mode) | 0.1 (-0.3-0.4)       | 0.658           |
|                          | Age class (> 13 vs. ≤ 13) |                               | -1.9 (-2.6--1.1)     | <b>&lt;.001</b> |
| BMI (kg/m <sup>2</sup> ) | Period                    | Automode 3M (vs. Manual Mode) | 0.0 (-0.2-0.3)       | 0.779           |
|                          | Period                    | Automode 6M (vs. Manual Mode) | 0.1 (-0.1-0.3)       | 0.205           |
|                          | Age class (> 13 vs. ≤ 13) |                               | 4.0 (2.9-5.1)        | <b>&lt;.001</b> |
| BMI z score              | Period                    | Automode 3M (vs. Manual Mode) | -0.1 (-0.2-0.0)      | 0.153           |
|                          | Period                    | Automode 6M (vs. Manual Mode) | -0.1 (-0.2-0.0)      | <b>0.050</b>    |
|                          | Age class (> 13 vs. ≤ 13) |                               | -0.1 (-0.5-0.3)      | 0.514           |

Abbreviations: Automode 3M, first 14 days after 3 months; Automode 6M, first 14 days after 6 months; BMI, body mass index; CI, confidence interval; GMI, glucose management indicator; SG CV, sensor glucose coefficient of variation; TDD, total daily dose; TIR, time in range. Bold indicates statistically significant.
