# Supplementary material for: Glycemic Control, Basal/Bolus Distribution, BMI and Meal Management in Children and Adolescents with Type 1 Diabetes and Advanced Hybrid Closed Loop
Source: MDPI journal article supplement (doi:10.3390/nu15234875), 2023-11-22
Supplement: s1 [file s1]

*Table 2 Supplementary. Multivariate models by gender*

| Outcome                  | Variable                  | Category                      | Mean change<br>(95% CI) | p-value         |
|--------------------------|---------------------------|-------------------------------|-------------------------|-----------------|
| TIR (%) 70-180 mg/dL     | Period                    | Automode 3M (vs. Manual Mode) | 9.9 (7.3-12.5)          | <b>&lt;.001</b> |
|                          | Period                    | Automode 6M (vs. Manual Mode) | 9.0 (6.9-11.1)          | <b>&lt;.001</b> |
|                          | Gender (Male vs. Female)  |                               | 3.9 (0.2-7.5)           | <b>0.037</b>    |
| SG CV (%)                | Period                    | Automode 3M (vs. Manual Mode) | -0.9 (-2.4-0.5)         | 0.205           |
|                          | Period                    | Automode 6M (vs. Manual Mode) | -0.2 (-1.4-1.0)         | 0.753           |
|                          | Gender (Male vs. Female)  |                               | 0.1 (-1.7-1.9)          | 0.883           |
| GMI (%)                  | Period                    | Automode 3M (vs. Manual Mode) | -0.3 (-0.5--0.2)        | <b>&lt;.001</b> |
|                          | Period                    | Automode 6M (vs. Manual Mode) | -0.4 (-0.5--0.3)        | <b>&lt;.001</b> |
|                          | Gender (Male vs. Female)  |                               | -0.2 (-0.3--0.0)        | <b>0.016</b>    |
| Basal volume (%)         | Period                    | Automode 3M (vs. Manual Mode) | -5.3 (-7.8--2.8)        | <b>&lt;.001</b> |
|                          | Period                    | Automode 6M (vs. Manual Mode) | -4.3 (-6.4--2.1)        | <b>&lt;.001</b> |
|                          | Gender (Male vs. Female)  |                               | -0.3 (-3.2-2.5)         | 0.814           |
| Bolus volume (%)         | Period                    | Automode 3M (vs. Manual Mode) | 4.8 (2.2-7.4)           | <b>&lt;.001</b> |
|                          | Period                    | Automode 6M (vs. Manual Mode) | 4.3 (2.0-6.5)           | <b>&lt;.001</b> |
|                          | Gender (Male vs. Female)  |                               | 0.1 (-2.8-3.0)          | 0.942           |
| TDD/kg (units)           | Period                    | Automode 3M (vs. Manual Mode) | 0.1 (0.0-0.1)           | <b>0.008</b>    |
|                          | Period                    | Automode 6M (vs. Manual Mode) | 0.1 (0.0-0.1)           | <b>&lt;.001</b> |
|                          | Gender (Male vs. Female)  |                               | 0.0 (-0.1-0.1)          | 0.580           |
| CHO/kg (gr)              | Period                    | Automode 3M (vs. Manual Mode) | 0.1 (-0.4-0.5)          | 0.810           |
|                          | Period                    | Automode 6M (vs. Manual Mode) | 0.1 (-0.3-0.4)          | 0.667           |
|                          | Gender (Male vs. Female)  |                               | 0.5 (-0.3-1.4)          | 0.235           |
| BMI (kg/m <sup>2</sup> ) | Period                    | Automode 3M (vs. Manual Mode) | 0.0 (-0.2-0.3)          | 0.774           |
|                          | Period                    | Automode 6M (vs. Manual Mode) | 0.1 (-0.1-0.3)          | 0.205           |
|                          | Gender (Male vs. Female)* |                               | 0.7 (-0.7-2.0)          | 0.350           |
| BMI z score              | Period                    | Automode 3M (vs. Manual Mode) | -0.1 (-0.2-0.0)         | 0.154           |
|                          | Period                    | Automode 6M (vs. Manual Mode) | -0.1 (-0.2-0.0)         | 0.051           |
|                          | Gender (Male vs. Female)* |                               | -0.2 (-0.5-0.2)         | 0.407           |

\*interaction test is significant

Abbreviations: Automode 3M, first 14 days after 3 months; Automode 6M, first 14 days after 6 months; BMI, body mass index; CI, confidence interval; GMI, glucose management indicator; SG CV, sensor glucose coefficient of variation; TDD, total daily dose; TIR, time in range. Bold indicates statistically significant.
